# Supplementary material for: A short synthesis of 7-amino alkoxy homoisoflavonoides
Source: Royal Society of Chemistry journal article supplement (doi:10.1039/c7ra08990b), 2017-01-01

## Supplementary materials

### A short synthesis of 7-amino alkoxy homoisoflavonoides

Ali Asadipour,<sup>a</sup> Yaghoob Pourshojaei,<sup>\*a,b</sup> Khalil Eskandari,<sup>\*a</sup> Alireza Foroumadi<sup>c</sup>

<sup>a</sup> *Department of Medicinal Chemistry, Faculty of Pharmacy & Pharmaceutics Research Center, Institute of Neuropharmacology, Kerman University of Medical Sciences, Kerman, Iran*

<sup>b</sup> *Neuroscience Research Center, Institute of Neuropharmacology, Kerman University of Medical Sciences, Kerman, Iran*

<sup>c</sup> *Drug Design and Development Research Center, Tehran University of Medical Sciences, Tehran, Iran*

## Supplementary materials

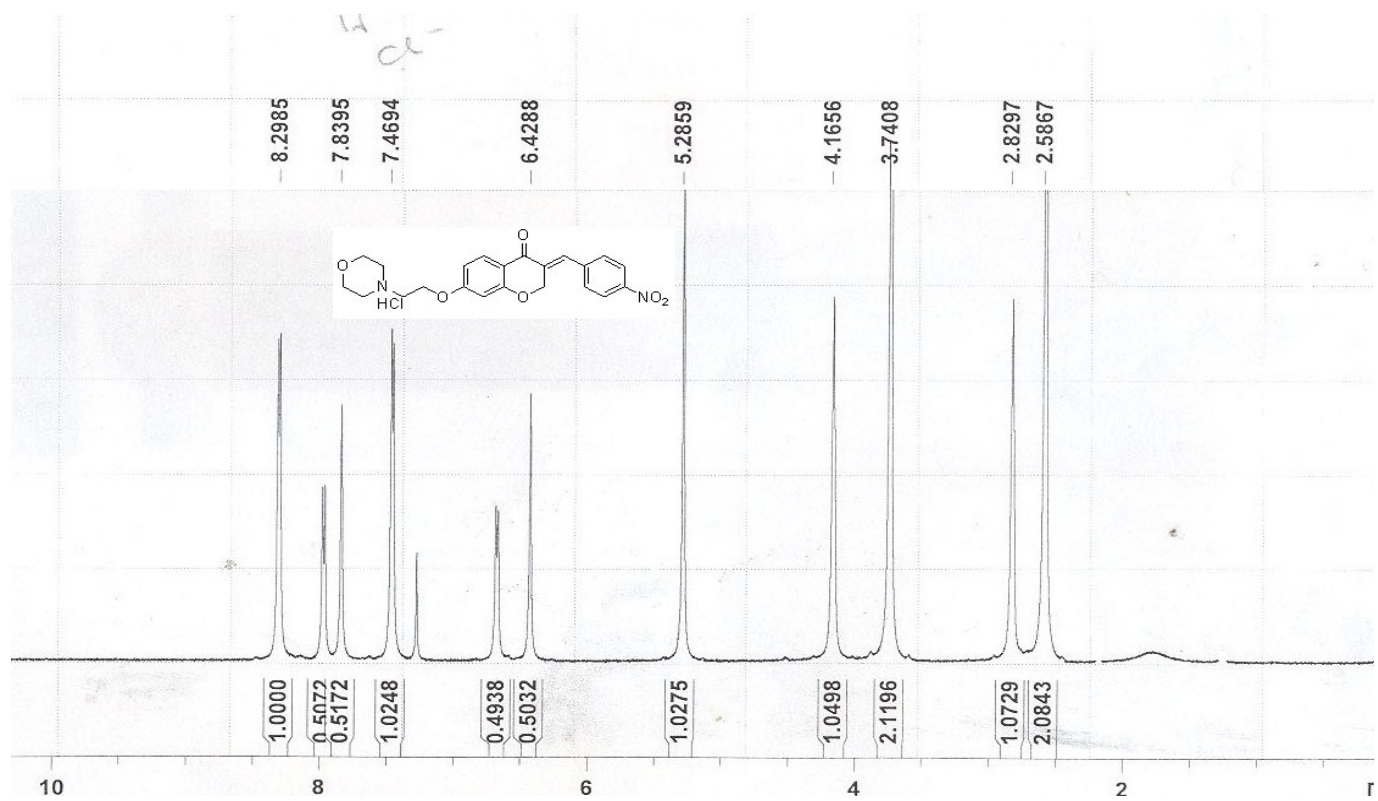

**Fig. S1.** <sup>1</sup>H NMR spectrum of product **8a**

## Supplementary materials

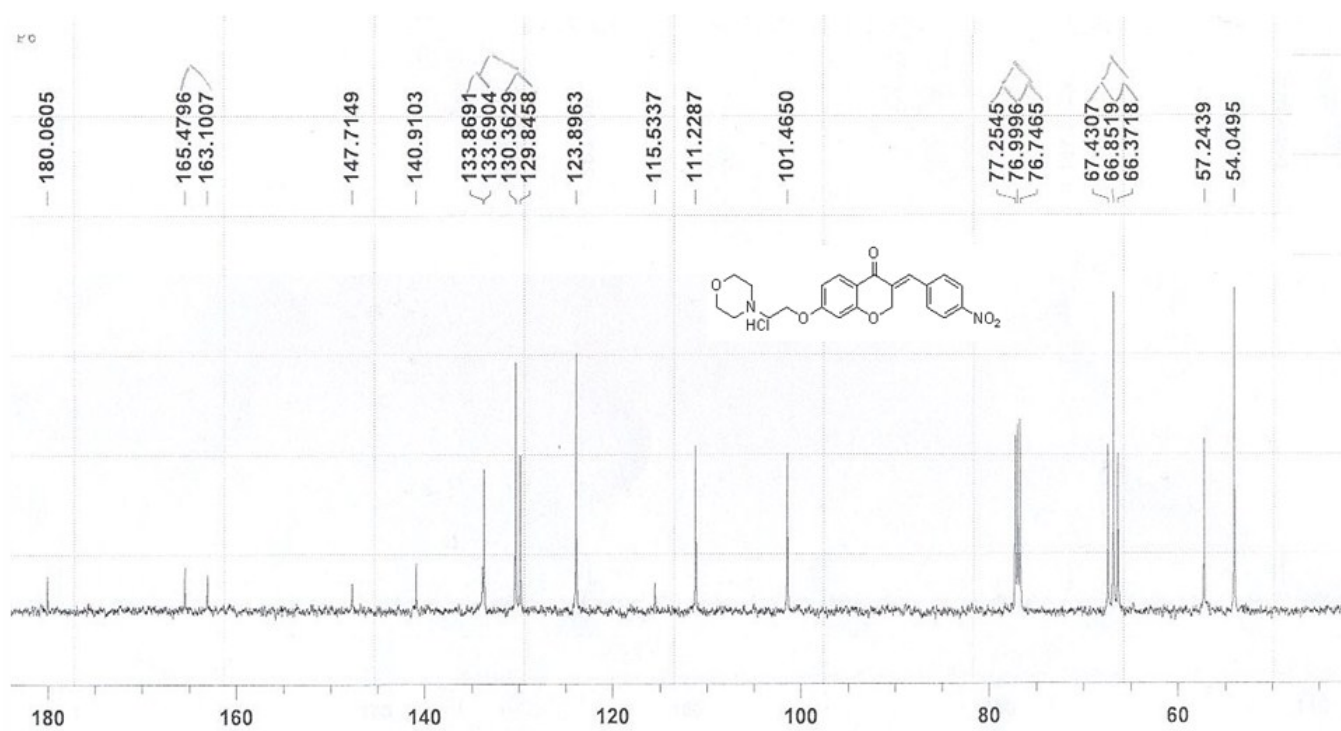

**Fig. S2.**  $^{13}\text{C}$  NMR spectrum of product **8a**

## Supplementary materials

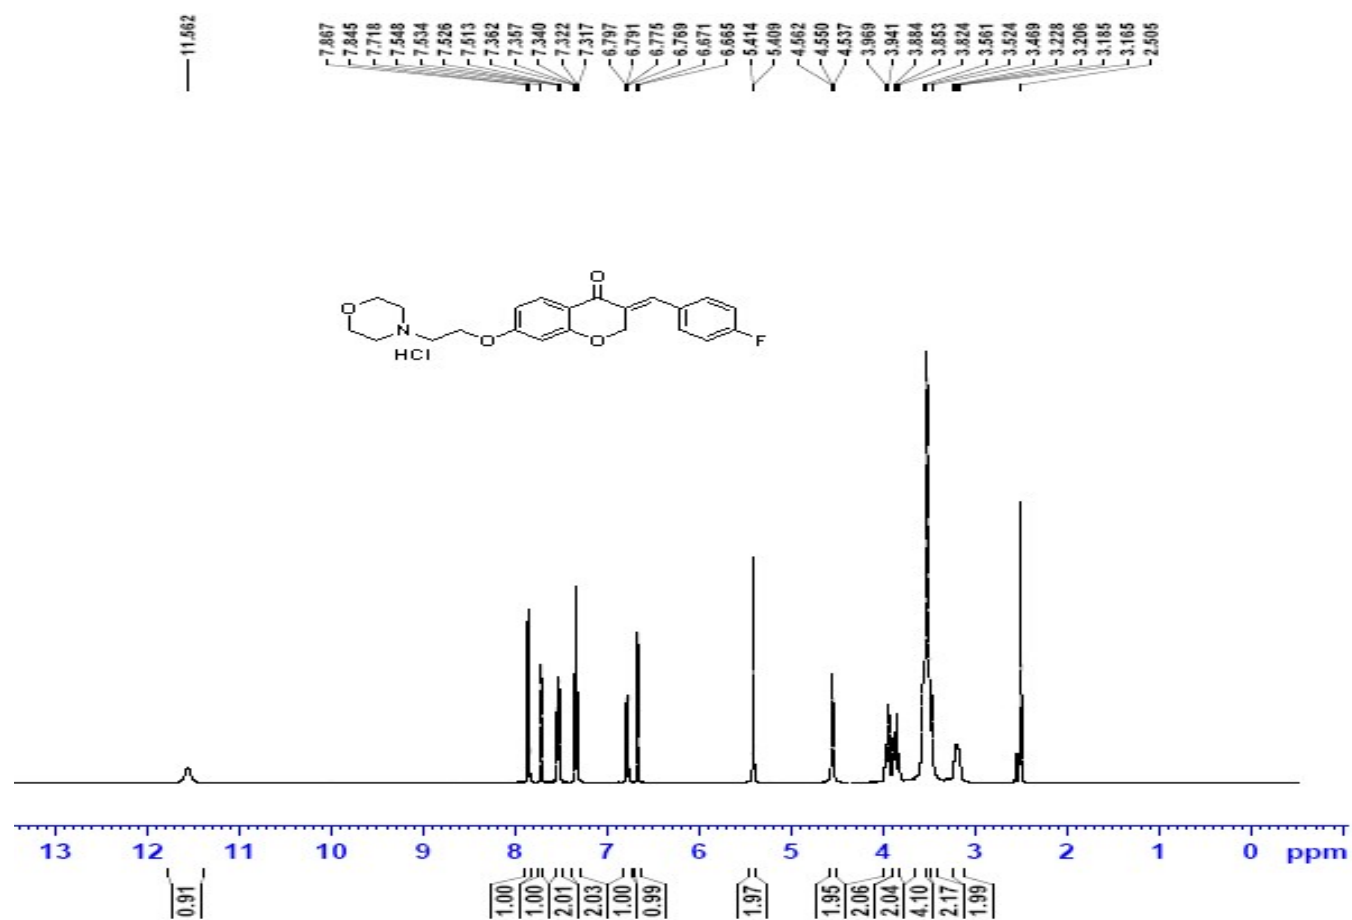

**Fig. S3.** <sup>1</sup>H NMR spectrum of product **8b**

## Supplementary materials

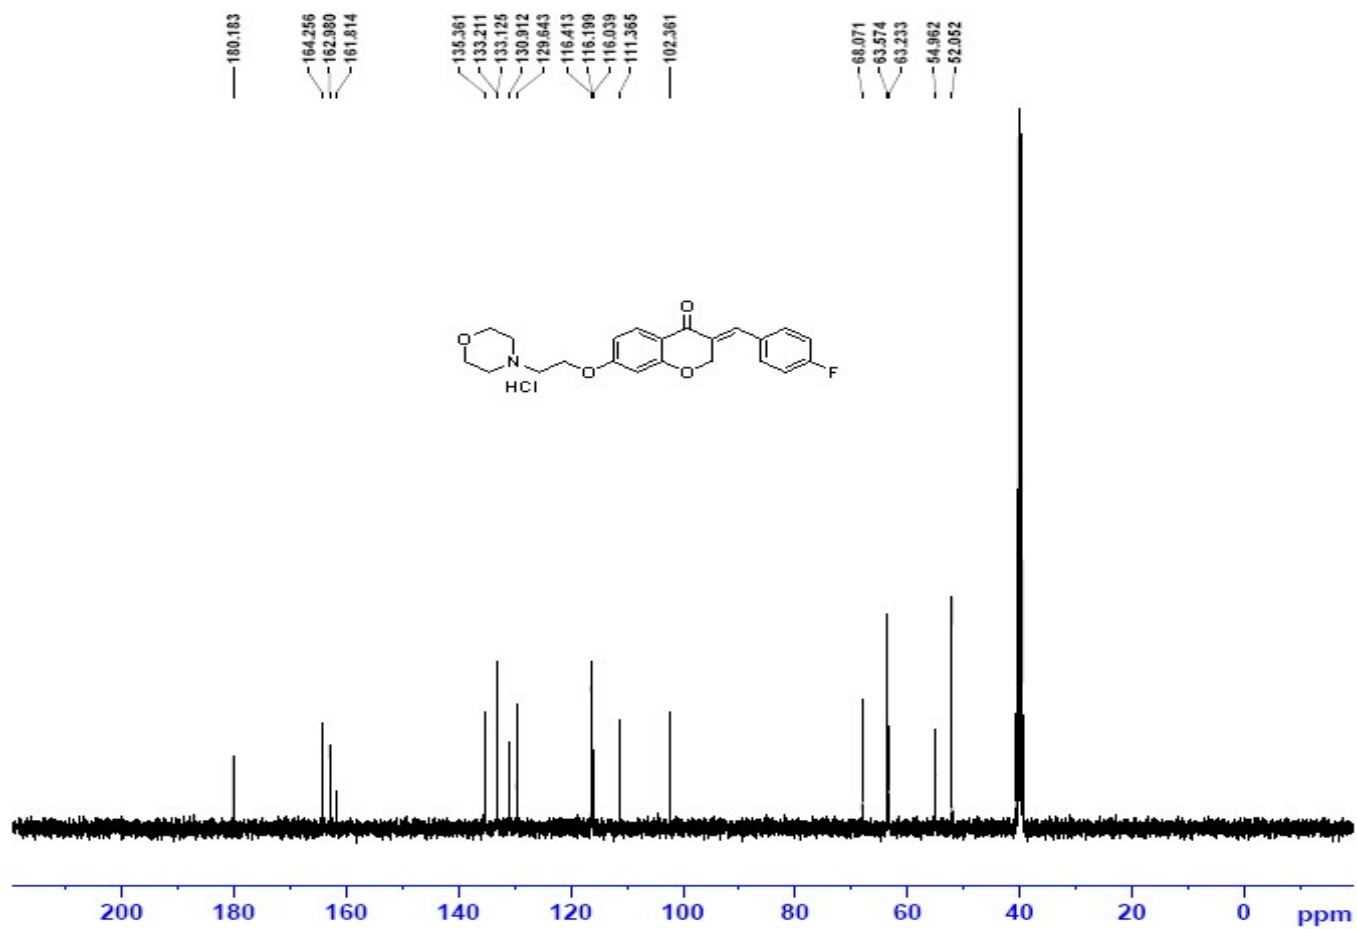

Fig. S4.  $^{13}\text{C}$  NMR spectrum of product **8b**

## Supplementary materials

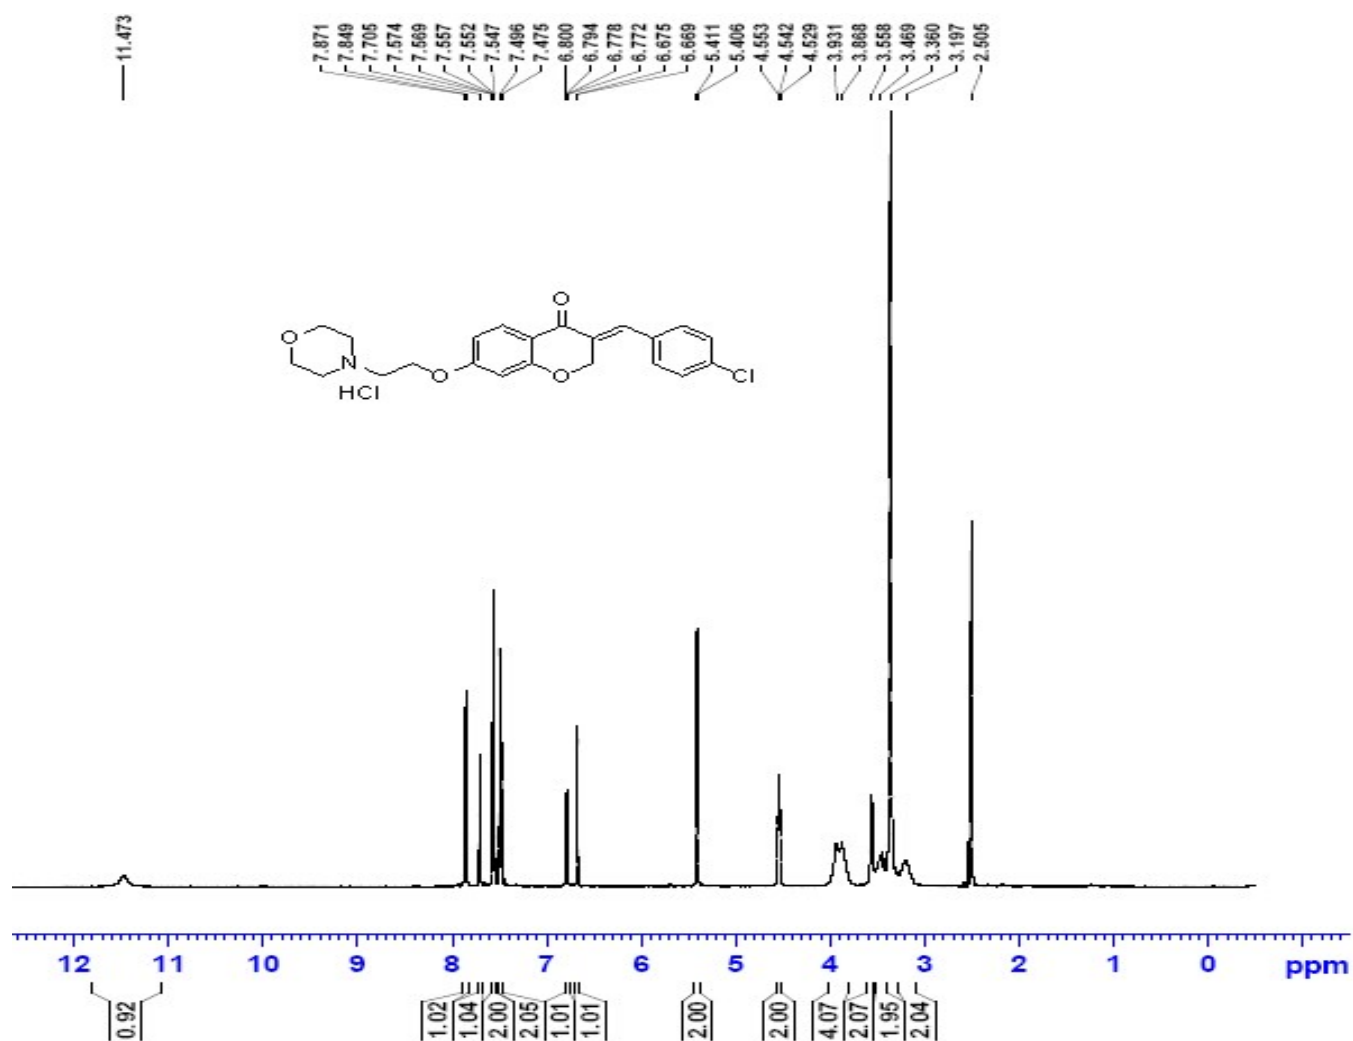

Fig. S5. <sup>1</sup>H NMR spectrum of product **8c**

## Supplementary materials

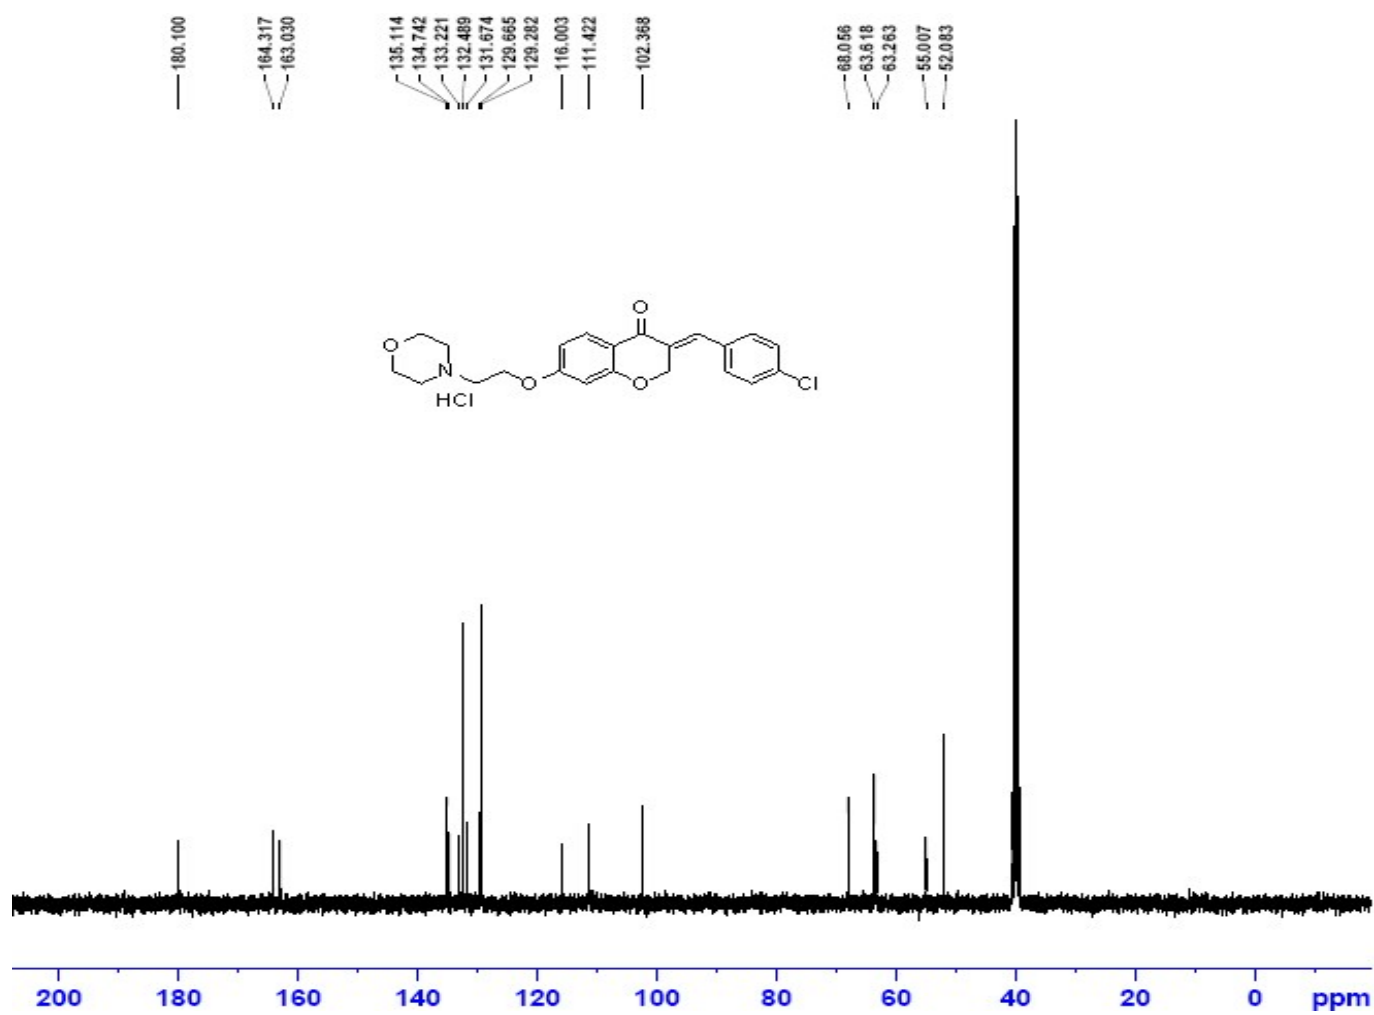

Fig. S6. <sup>13</sup>C NMR spectrum of product **8c**

## Supplementary materials

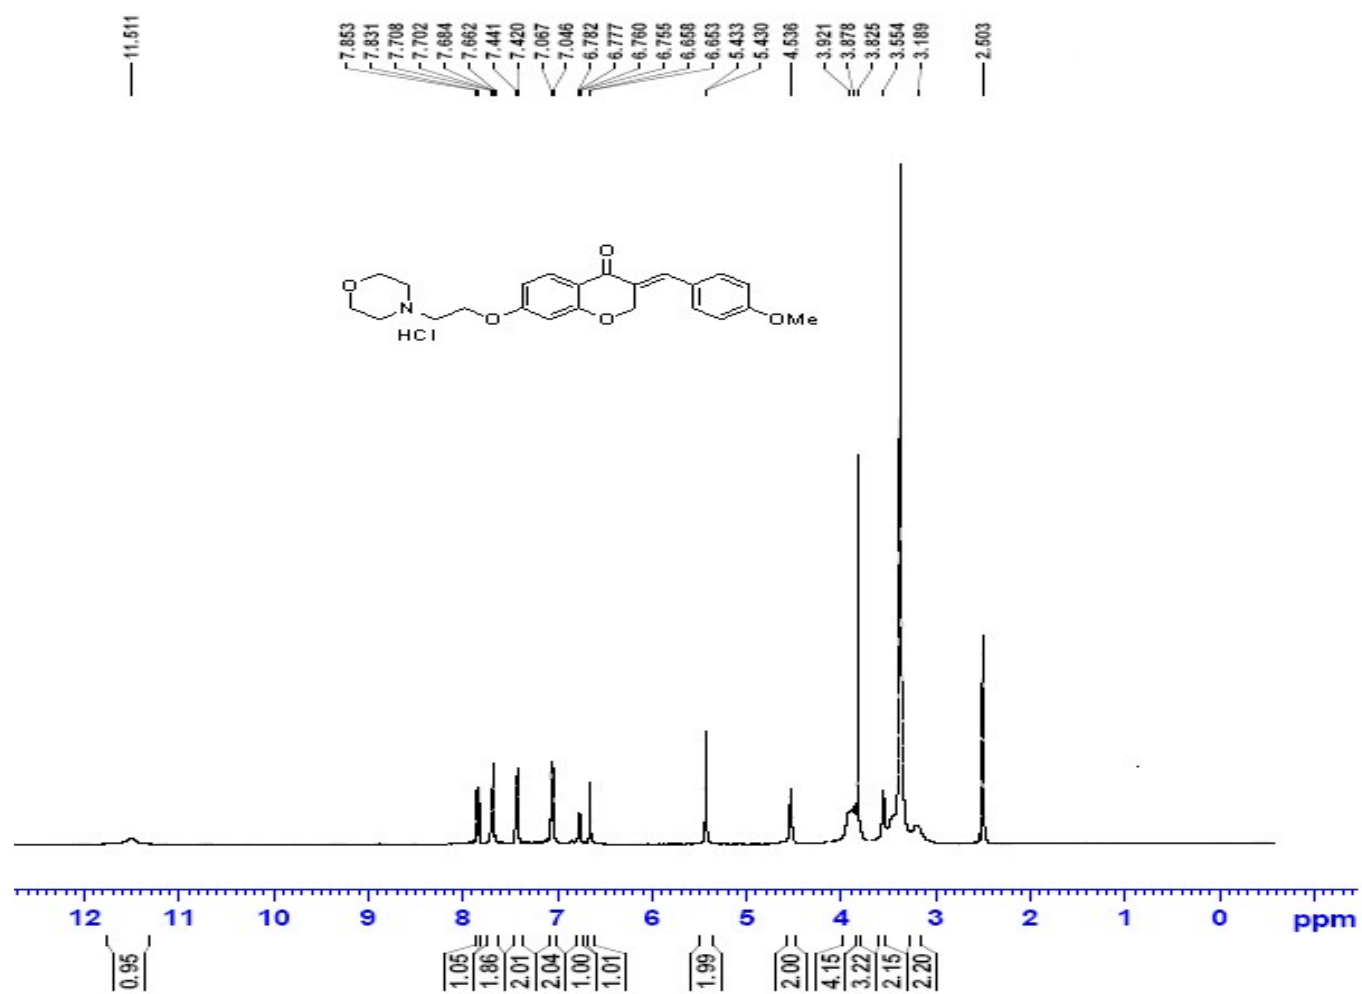

Fig. S7.  $^1\text{H}$  NMR spectrum of product **8d**



## Supplementary materials

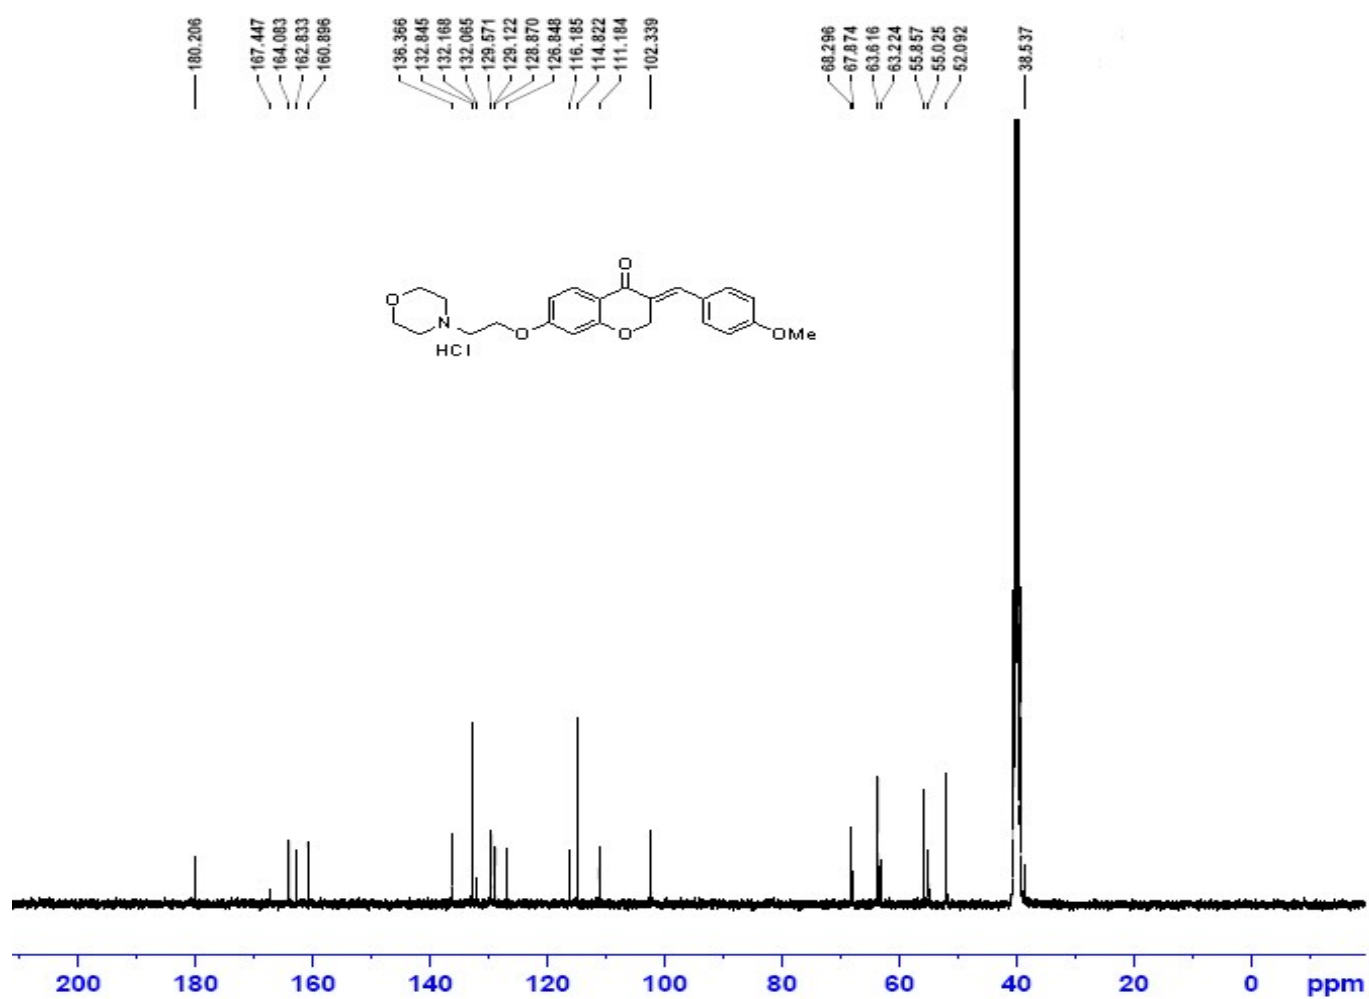

Fig. S8. <sup>13</sup>C NMR spectrum of product **8d**

## Supplementary materials

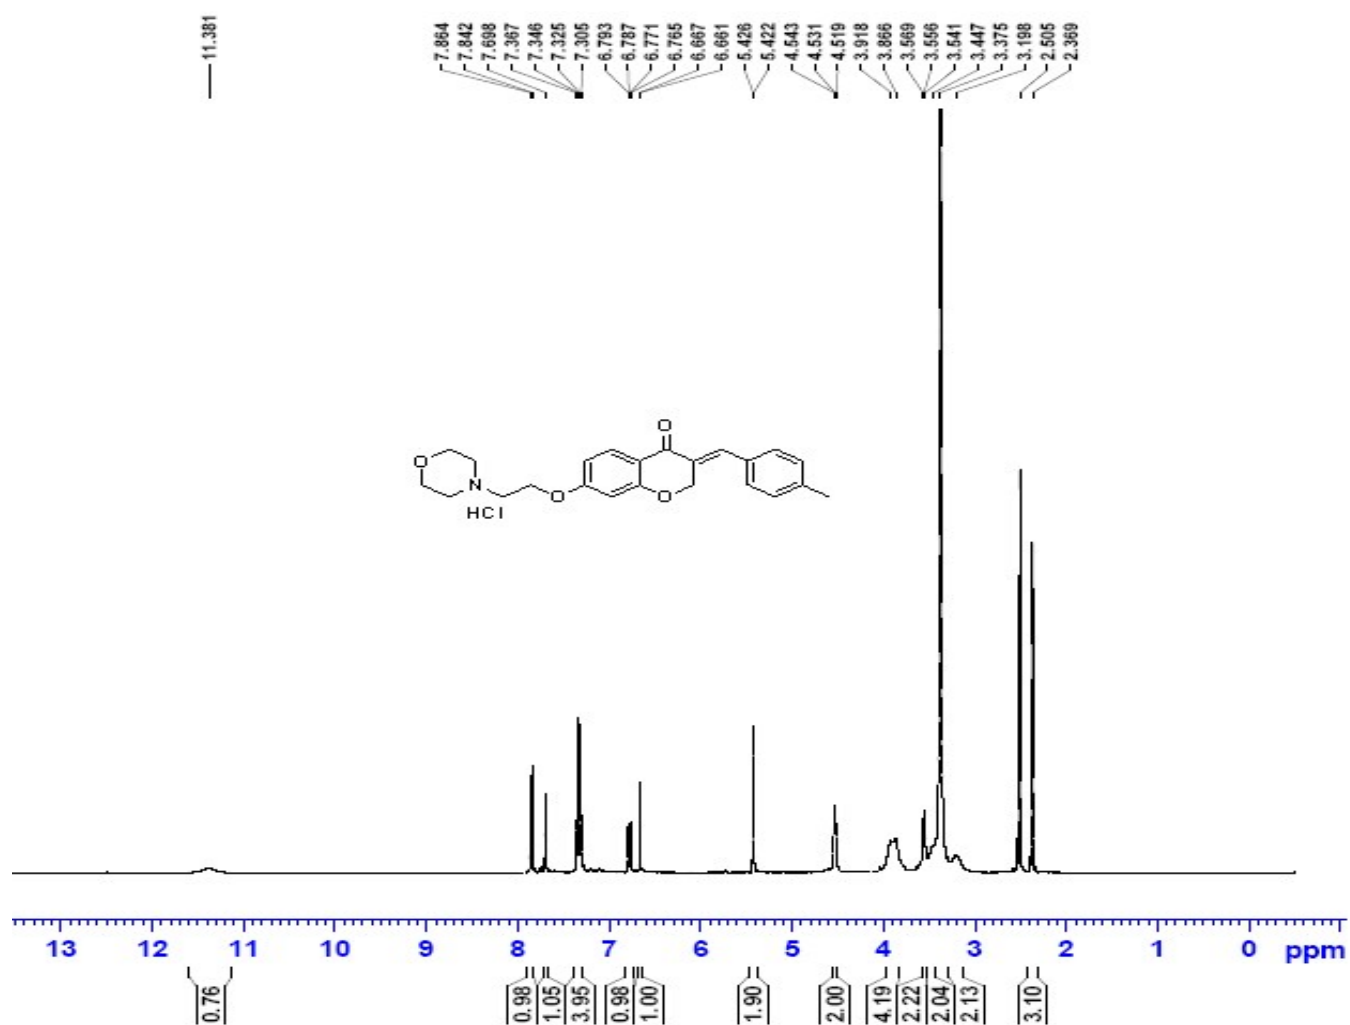

**Fig. S9.** <sup>1</sup>H NMR spectrum of product **8e**

## Supplementary materials

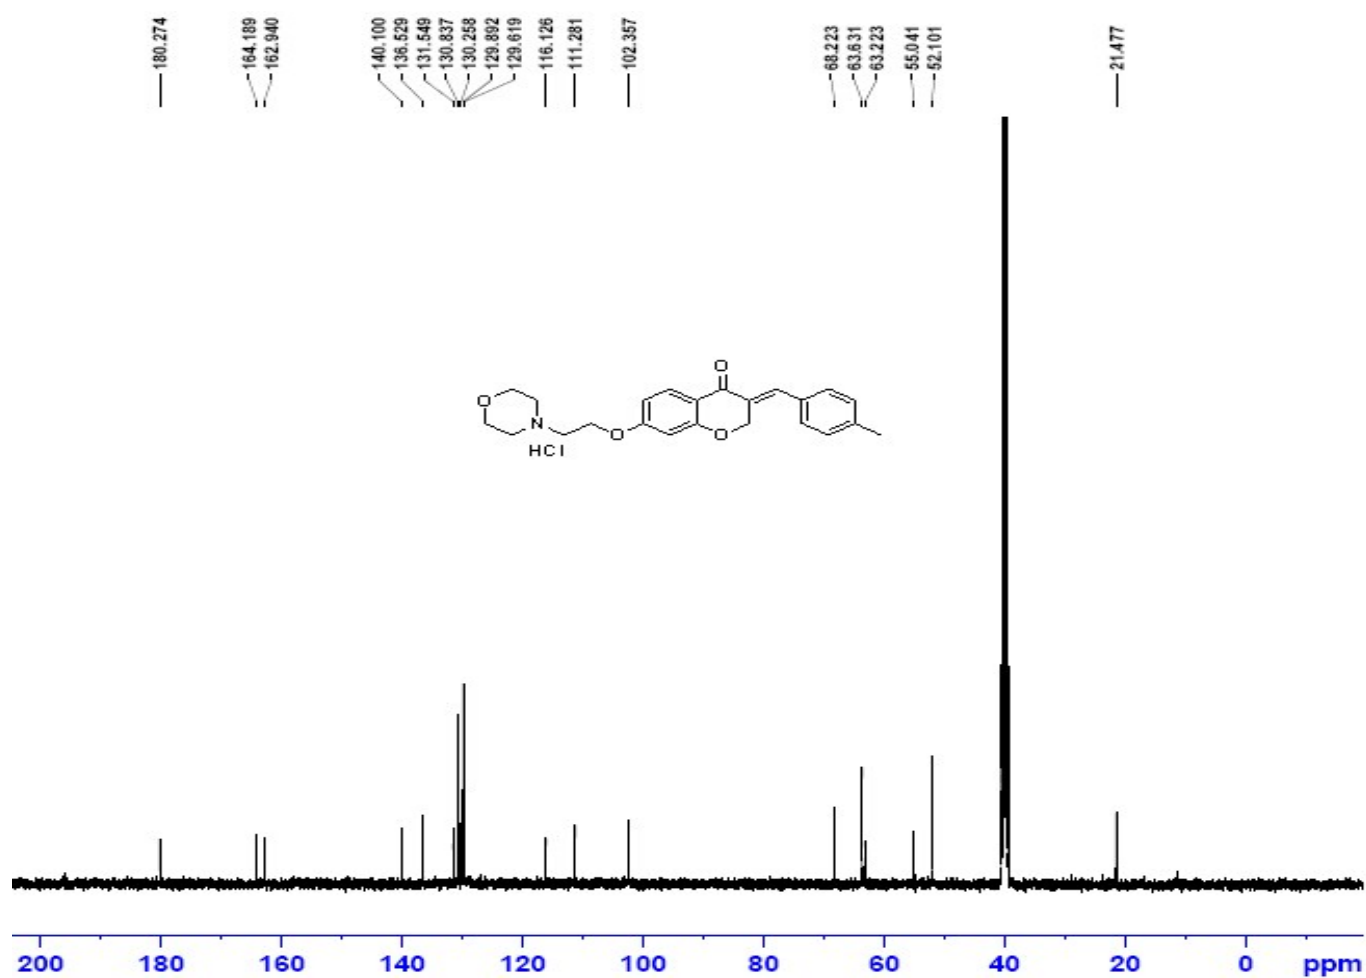

Fig. S10.  $^{13}\text{C}$  NMR spectrum of product **8e**

## Supplementary materials

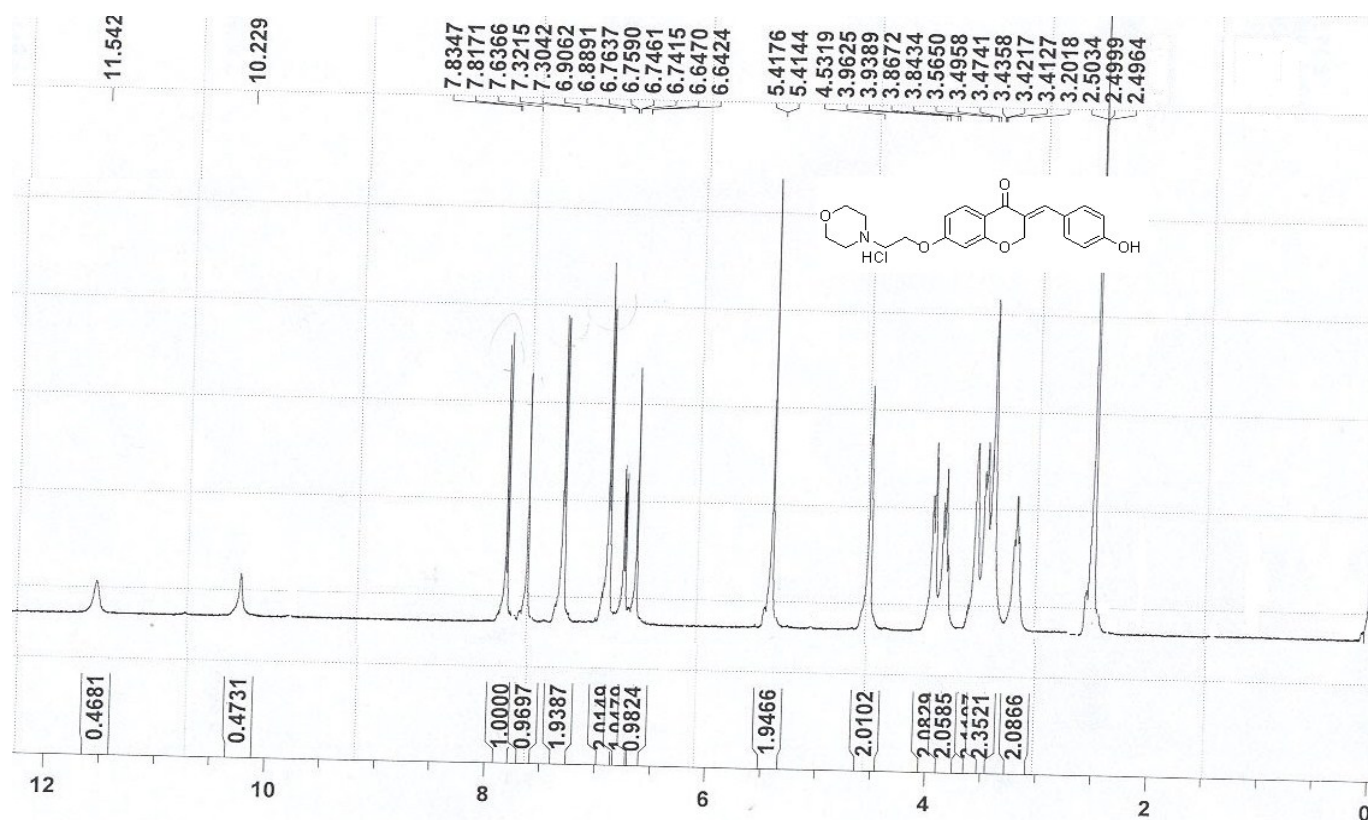

Fig. S11. <sup>1</sup>H NMR spectrum of product **8f**

## Supplementary materials

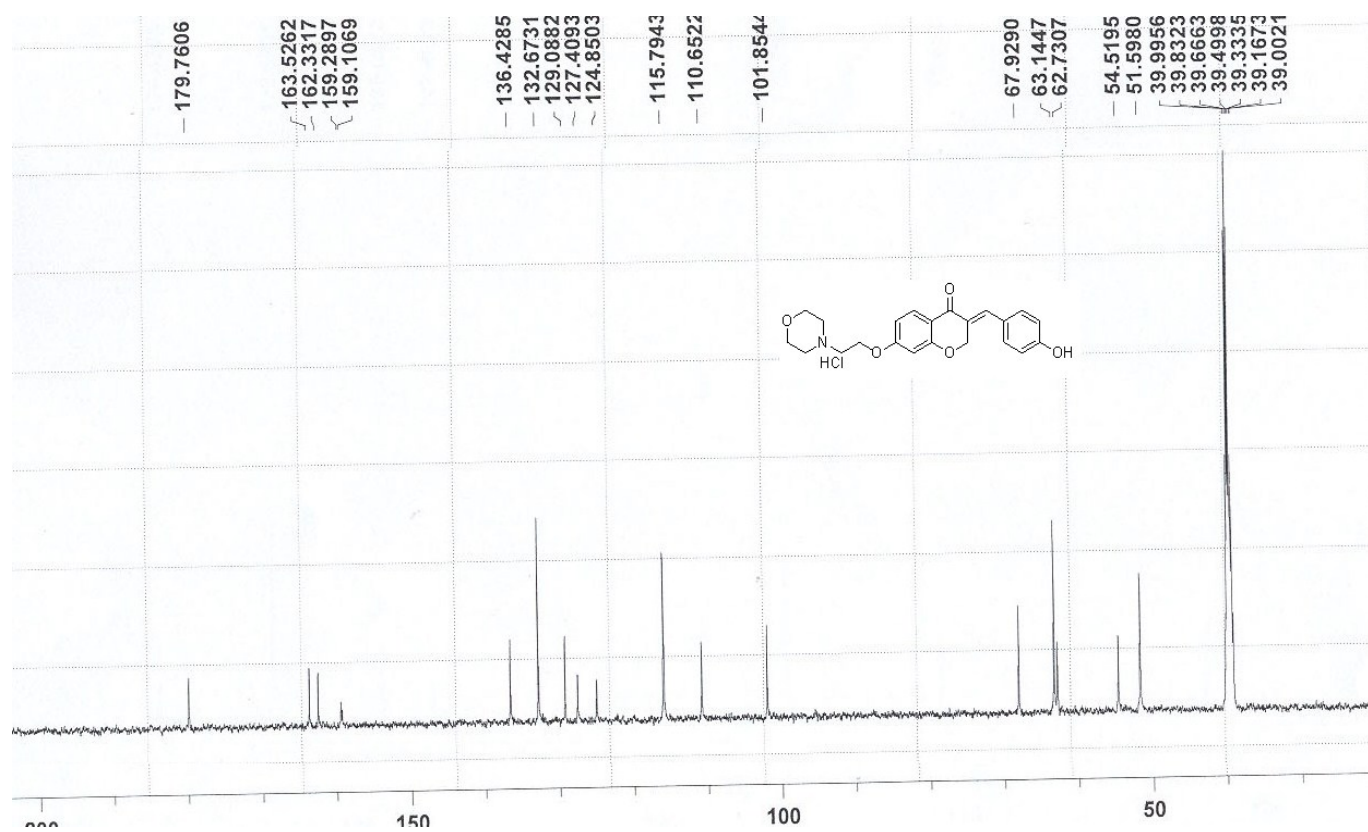

Fig. S12. <sup>13</sup>C NMR spectrum of product 8f

## Supplementary materials

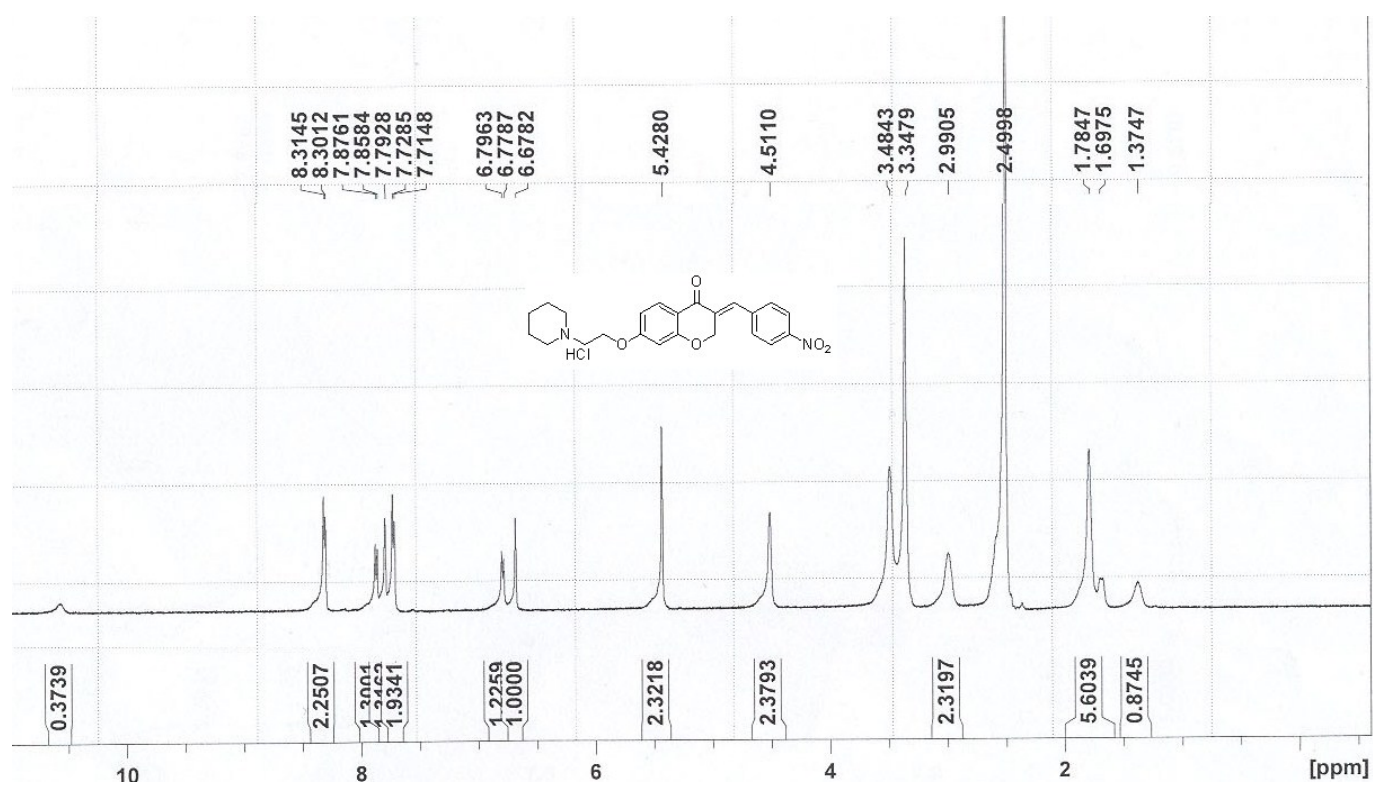

Fig. S13. <sup>1</sup>H NMR spectrum of product **8g**

## Supplementary materials

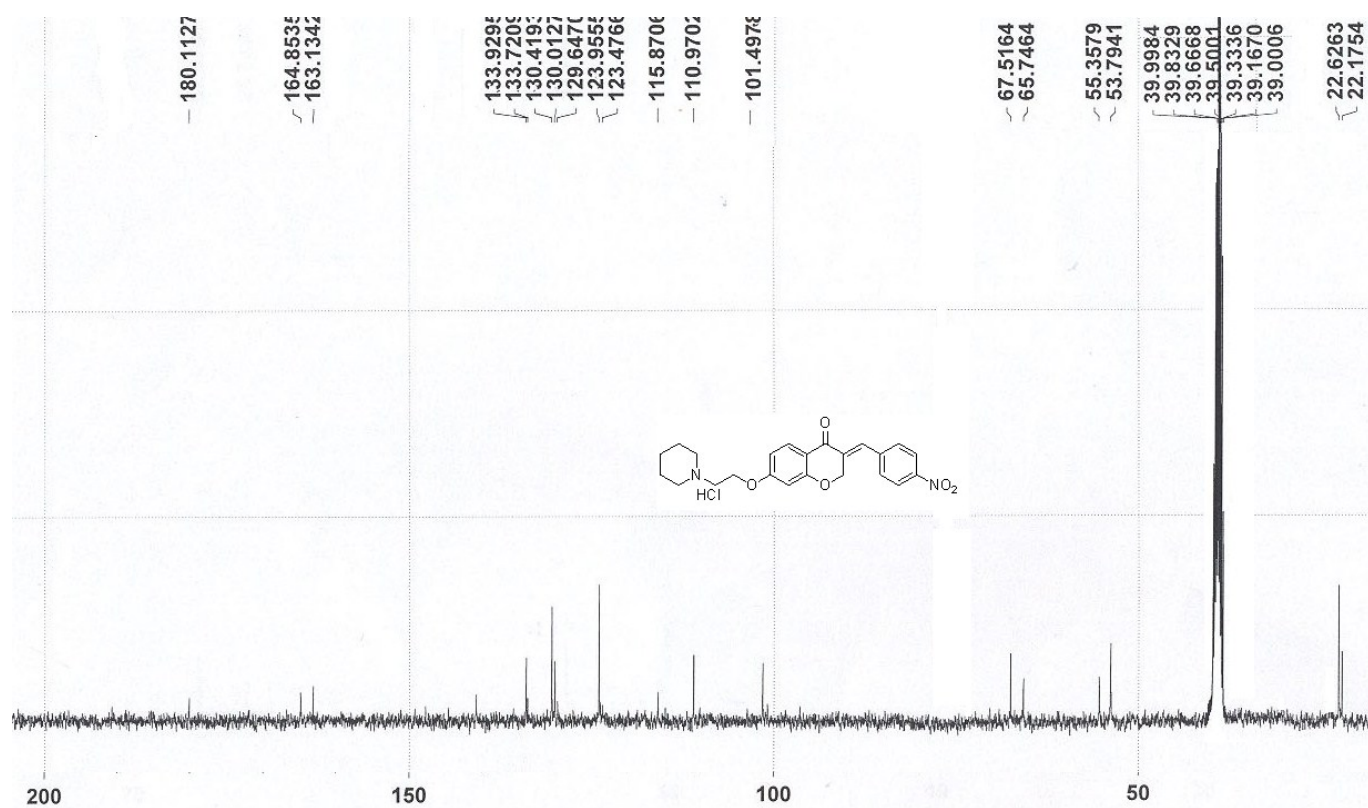

Fig. S14. <sup>13</sup>C NMR spectrum of product **8g**



## Supplementary materials

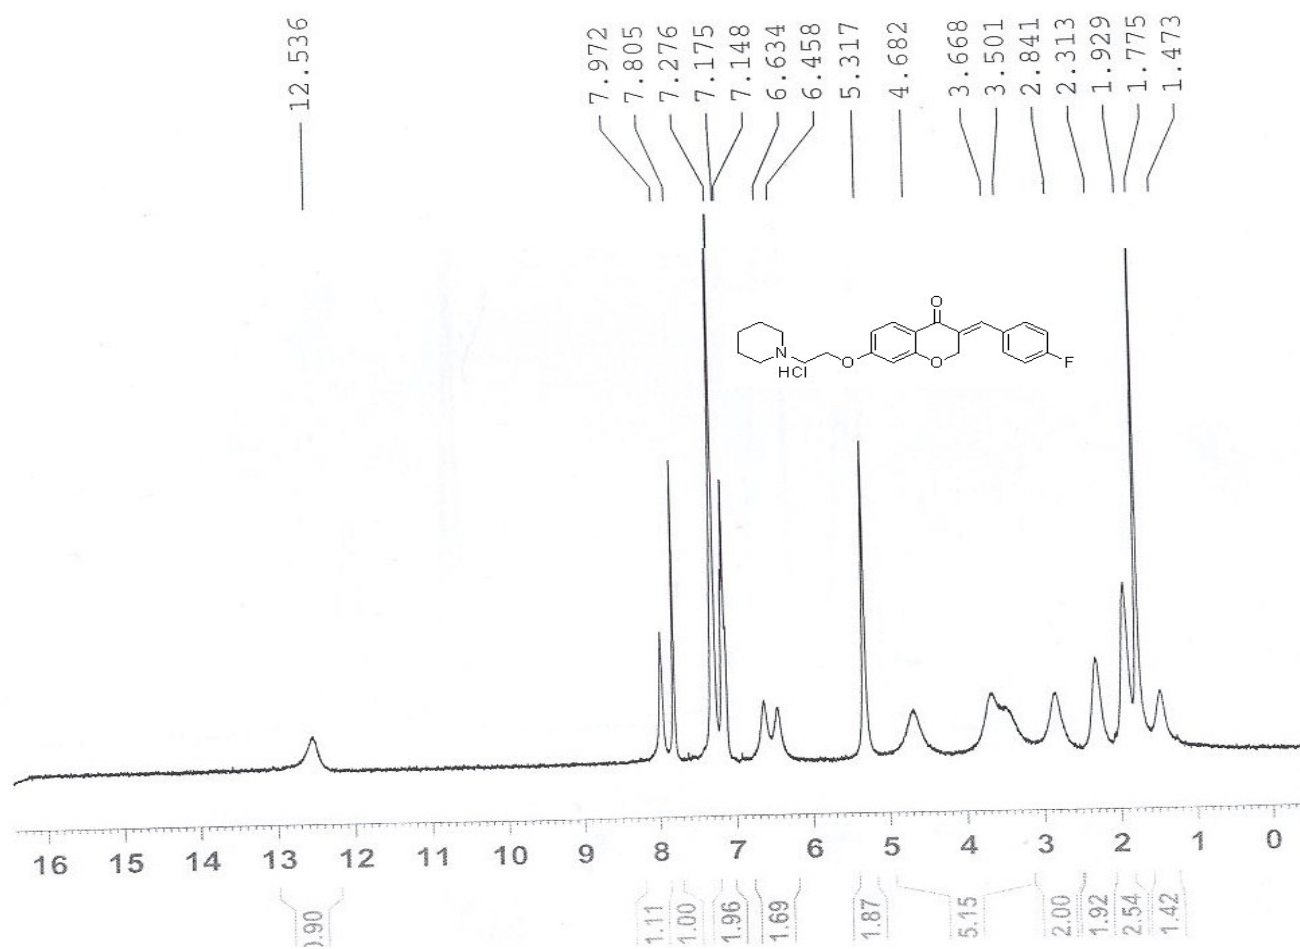

**Fig. S15.** <sup>1</sup>H NMR spectrum of product **8h**



## Supplementary materials

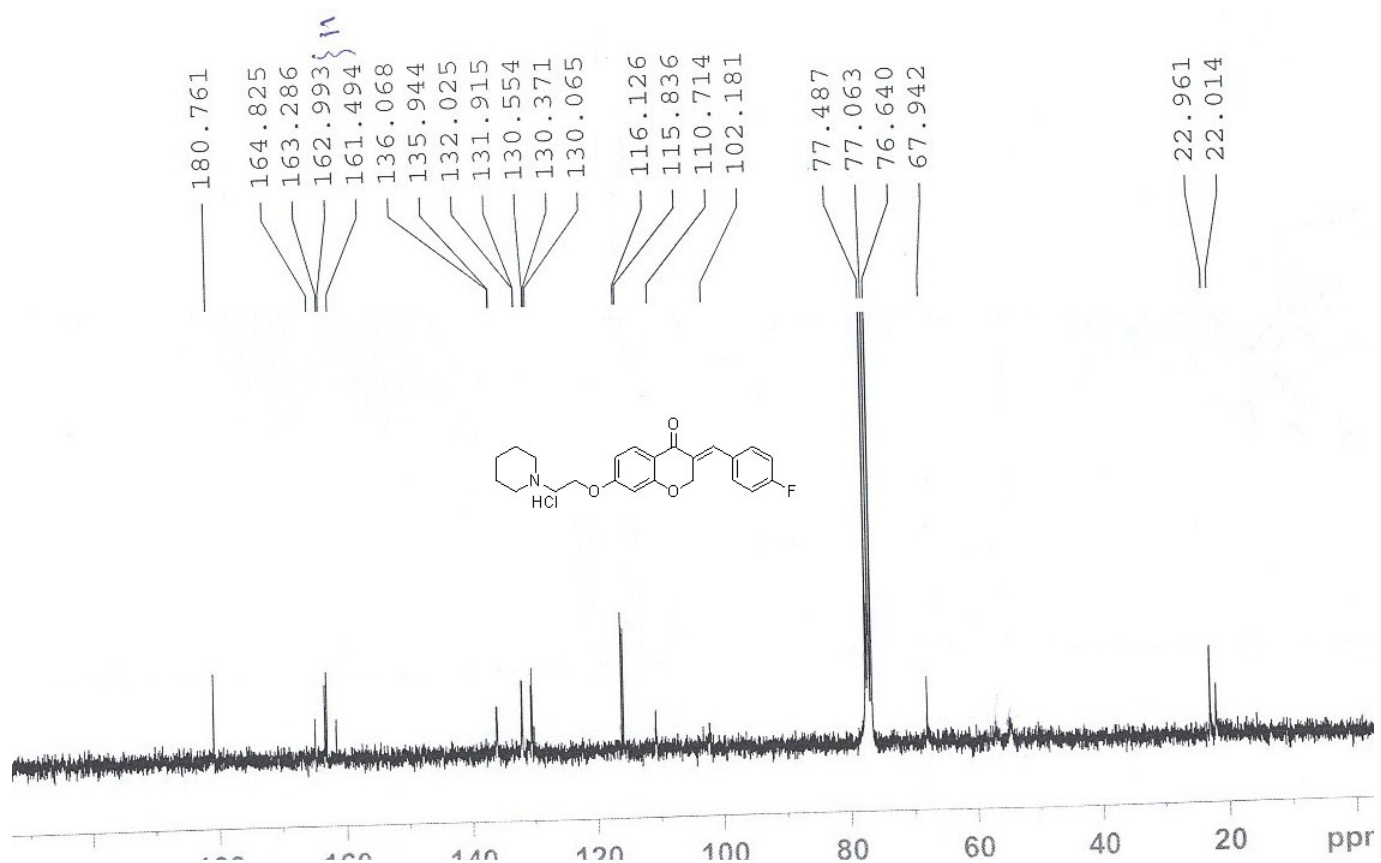

**Fig. S16.**  $^{13}\text{C}$  NMR spectrum of product **8h**

## Supplementary materials

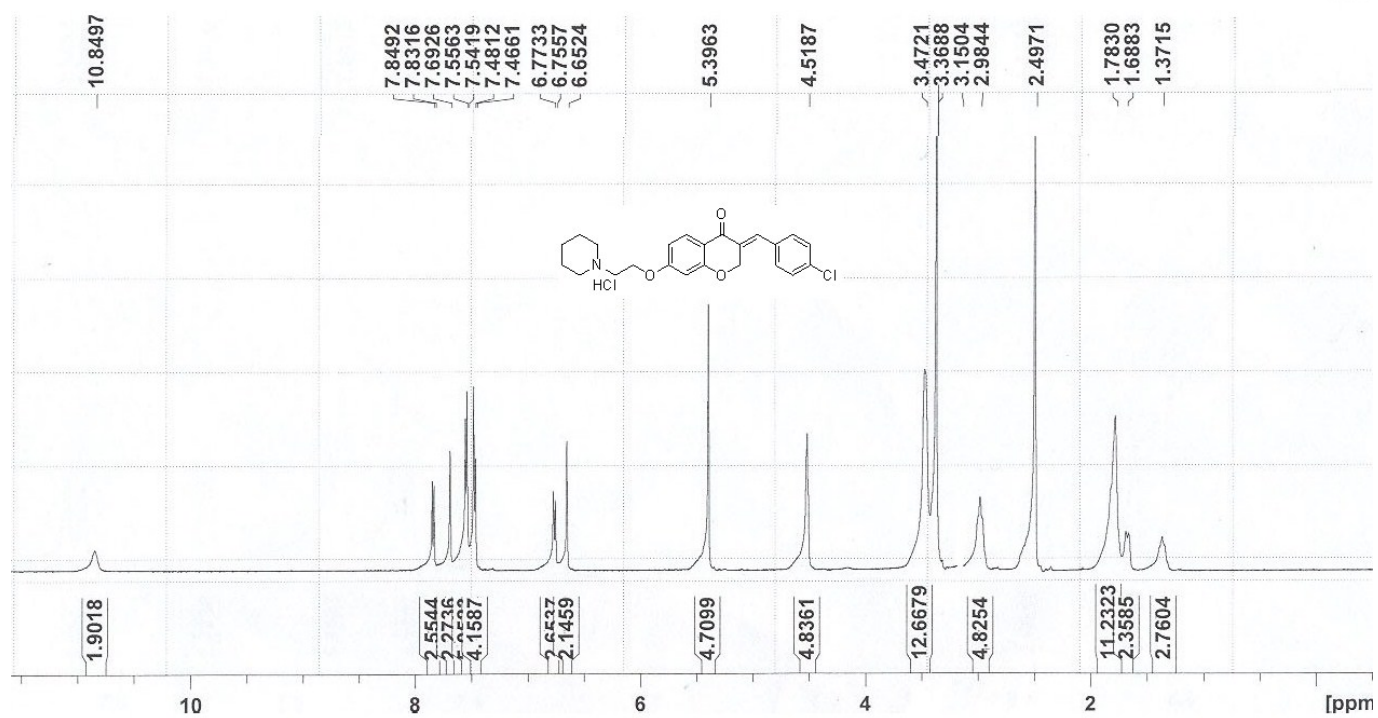

**Fig. S17.** <sup>1</sup>H NMR spectrum of product **8i**

## Supplementary materials

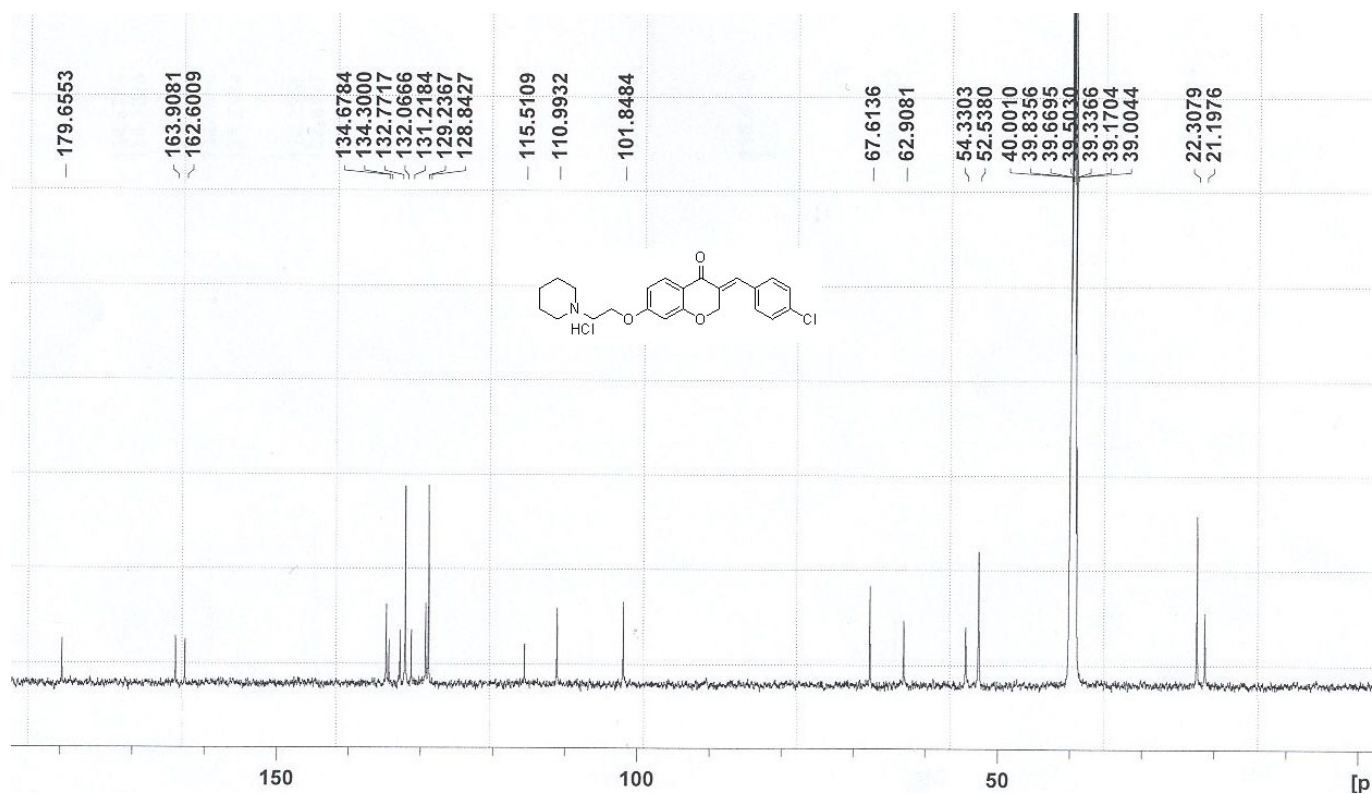

Fig. S18. <sup>13</sup>C NMR spectrum of product 8i

## Supplementary materials

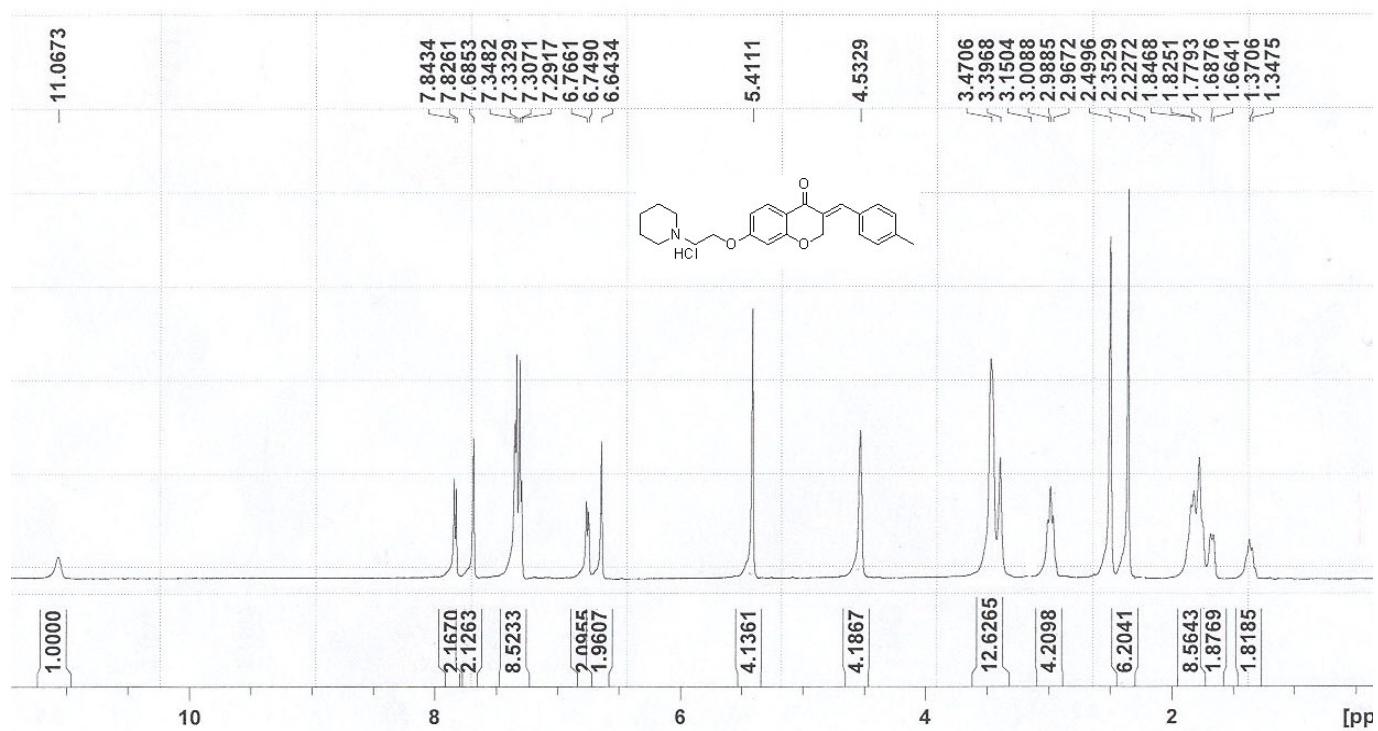

Fig. S19. <sup>1</sup>H NMR spectrum of product **8k**

## Supplementary materials

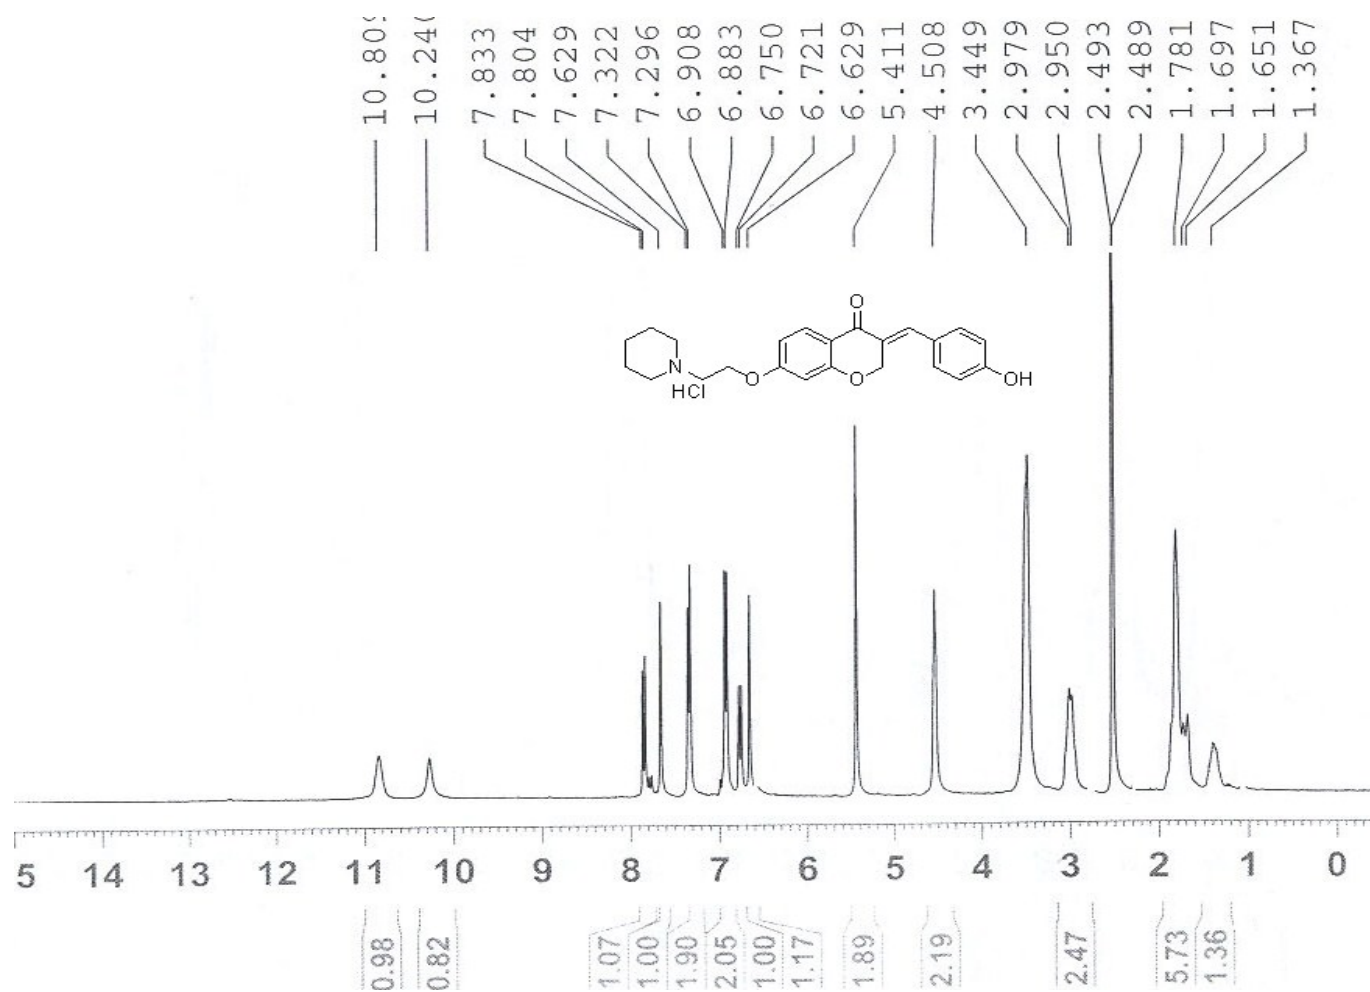

Fig. S20. <sup>1</sup>H NMR spectrum of product **8I**

## Supplementary materials

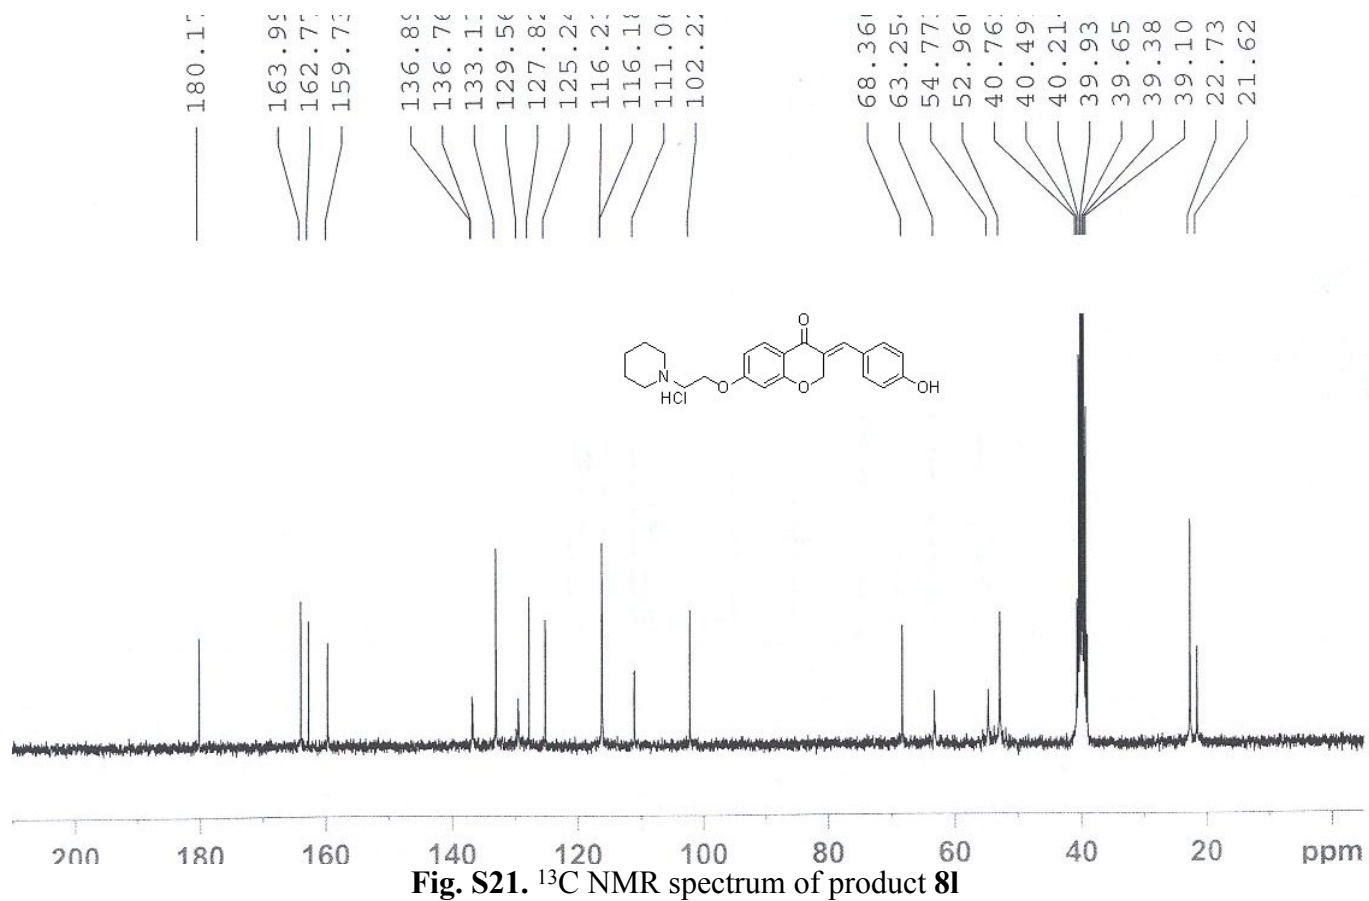

Supplement: c7ra08990b1.pdf [file c7ra08990b1.pdf]
